# Supplementary material for: Direct immunoassay on a polyester microwell plate for colorimetric detection of the spike protein in swab and saliva samples
Source: Royal Society of Chemistry journal article supplement (doi:10.1039/d3ay01755a), 2023-11-21
Supplement: d3ay01755a1.pdf [file d3ay01755a1.pdf]

## Supplementary Material for:

### Direct Immunoassay on Polyester Microwell Plate for Colorimetric Detection of Spike Protein in Swab and Saliva Samples

Nikaele S. Moreira,<sup>a</sup> Thaisa A. Baldo,<sup>a</sup> Lucas C. Duarte,<sup>a,e</sup> Leonardo Lopes-Luz,<sup>b</sup> Karoliny A. Oliveira,<sup>a</sup> Paulo F. N. Estrela,<sup>a</sup> Amanda M. Simões,<sup>a</sup> Samira Bühner-Sékula,<sup>bc</sup> Gabriela R. M. Duarte,<sup>ac</sup> and Wendell K. T. Coltro<sup>\*acd</sup>

<sup>a</sup>Instituto de Química, Universidade Federal de Goiás, 74690-900, Goiânia, GO, Brazil.

<sup>b</sup>Instituto de Patologia Tropical e Saúde Pública, Centro Multiusuário de Bioinsumos e Tecnologias em Saúde, Universidade Federal de Goiás, 74605-050, Goiânia, GO, Brazil.

<sup>c</sup>Innovation Hub in Point-of-Care Technologies, 74690-900, Goiânia, GO, Brazil.

<sup>d</sup>Instituto Nacional de Ciência e Tecnologia de Bioanalítica, 13084-971, Campinas, SP, Brazil.

<sup>e</sup>Instituto Federal de Educação, Ciência e Tecnologia de Goiás – Campus Inhumas, 75402-556, Inhumas, GO, Brazil

#### \*Corresponding Author:

Professor Wendell K. T. Coltro

Instituto de Química, Universidade Federal de Goiás

Campus Samambaia, 74690-900

Goiânia, GO, Brazil

Fax: +55 62 3521 1127

E-mail: [wendell@ufg.br](mailto:wendell@ufg.br)

ORCID: <http://orcid.org/0000-0002-4009-2291>

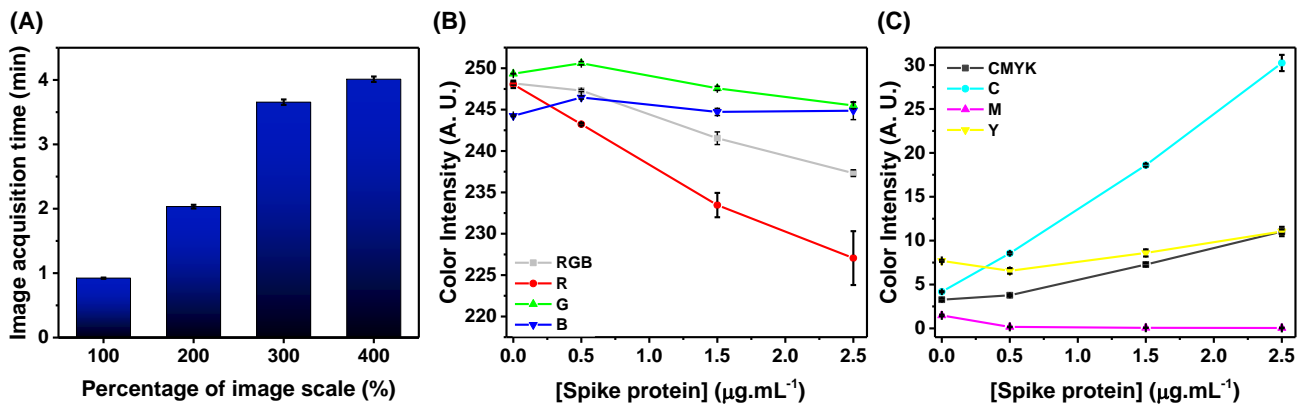

**Figure S1.** (A) Evaluation of the image percentage scale in image acquisition time using the scanner. Colorimetric responses obtained from the S protein detection reaction on the microplate were analyzed in the color systems RGB (B) and CMYK (C) of different color channels.

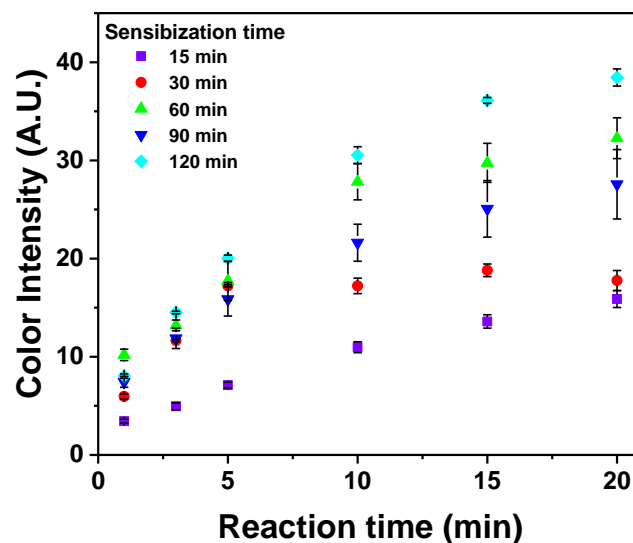

**Figure S2.** Optimization of sensitization step of direct ELISA for detection of SARS-CoV-2. The concentration of S-protein used was 1.5 µg mL<sup>-1</sup>.

**Table S1.** Evaluation of repeatability intraplate and interplate.

| [S protein] µg. mL <sup>-1</sup><br>(n=5) | RSD (%)              |                       |
|-------------------------------------------|----------------------|-----------------------|
|                                           | Intraplate (1 plate) | Interplate (3 plates) |
| 1.5                                       | 3.7                  | 7.7                   |
| 2.5                                       | 7.2                  | 5.9                   |
| 5.0                                       | 7.8                  | 2.3                   |
| 10.0                                      | 3.7                  | 5.2                   |

**Table S2:** Results of human Saliva and Swab samples tested using the gold standard RT-qPCR assay and the developed direct ELISA method on a polyester plate.

| Sample | Sample type | Classification gold std. | direct ELISA    |                 |                 |                |             | Classification |
|--------|-------------|--------------------------|-----------------|-----------------|-----------------|----------------|-------------|----------------|
|        |             |                          | 1 <sup>st</sup> | 2 <sup>nd</sup> | 3 <sup>rd</sup> | Average (A.U.) | Std dev.    |                |
| 1      | Saliva      | Negative                 | 4.80            | 5.10            | 4.48            | <b>4.79</b>    | <b>0.31</b> | Negative       |
| 2      | Saliva      | Negative                 | 4.23            | 4.06            | 4.35            | <b>4.21</b>    | <b>0.15</b> | Negative       |
| 3      | Saliva      | Negative                 | 5.21            | 5.1             | 5.32            | <b>5.21</b>    | <b>0.11</b> | Negative       |
| 4      | Saliva      | Negative                 | 3.24            | 3.05            | 3.75            | <b>3.35</b>    | <b>0.36</b> | Negative       |
| 5      | Saliva      | Negative                 | 4.31            | 4.48            | 5.00            | <b>4.60</b>    | <b>0.36</b> | Negative       |
| 6      | Saliva      | Negative                 | 5.20            | 5.33            | 5.34            | <b>5.29</b>    | <b>0.08</b> | Negative       |
| 7      | Saliva      | Negative                 | 6.23            | 6.49            | 5.48            | <b>6.07</b>    | <b>0.52</b> | Positive       |
| 8      | Swab        | Negative                 | 4.76            | 3.49            | 3.84            | <b>4.03</b>    | <b>0.66</b> | Negative       |
| 9      | Swab        | Negative                 | 4.30            | 4.45            | 4.10            | <b>4.28</b>    | <b>0.18</b> | Negative       |
| 10     | Swab        | Negative                 | 3.16            | 3.44            | 3.1             | <b>3.23</b>    | <b>0.18</b> | Negative       |
| 11     | Swab        | Negative                 | 5.42            | 5.24            | 4.47            | <b>5.04</b>    | <b>0.50</b> | Negative       |
| 12     | Swab        | Negative                 | 3.28            | 3.08            | 3.32            | <b>3.23</b>    | <b>0.13</b> | Negative       |
| 13     | Swab        | Negative                 | 2.57            | 2.56            | 2.74            | <b>2.62</b>    | <b>0.10</b> | Negative       |
| 14     | Swab        | Negative                 | 4.31            | 4.84            | 4.69            | <b>4.61</b>    | <b>0.27</b> | Negative       |
| 15     | Swab        | Negative                 | 4.23            | 4.62            | 4.52            | <b>4.46</b>    | <b>0.20</b> | Negative       |
| 16     | Swab        | Negative                 | 3.24            | 3.40            | 4.32            | <b>3.65</b>    | <b>0.58</b> | Negative       |
| 17     | Saliva      | Positive                 | 6.23            | 6.43            | 6.34            | <b>6.33</b>    | <b>0.10</b> | Positive       |
| 18     | Saliva      | Positive                 | 6.70            | 7.20            | 6.19            | <b>6.70</b>    | <b>0.51</b> | Positive       |
| 19     | Saliva      | Positive                 | 6.06            | 6.58            | 6.79            | <b>6.48</b>    | <b>0.38</b> | Positive       |
| 20     | Saliva      | Positive                 | 6.24            | 6.94            | 6.6             | <b>6.59</b>    | <b>0.35</b> | Positive       |
| 21     | Saliva      | Positive                 | 6.37            | 6.96            | 7.36            | <b>6.90</b>    | <b>0.50</b> | Positive       |
| 22     | Saliva      | Positive                 | 6.72            | 6.92            | 6.82            | <b>6.82</b>    | <b>0.10</b> | Positive       |
| 23     | Saliva      | Positive                 | 10.02           | 9.37            | 10.76           | <b>10.06</b>   | <b>0.70</b> | Positive       |
| 24     | Saliva      | Positive                 | 18.70           | 17.08           | 17.61           | <b>17.80</b>   | <b>0.83</b> | Positive       |
| 25     | Saliva      | Positive                 | 14.72           | 13.45           | 14.07           | <b>14.08</b>   | <b>0.64</b> | Positive       |
| 26     | Saliva      | Positive                 | 13.62           | 12.42           | 12.94           | <b>13.00</b>   | <b>0.61</b> | Positive       |
| 27     | Saliva      | Positive                 | 9.92            | 8.56            | 9.23            | <b>9.24</b>    | <b>0.68</b> | Positive       |
| 28     | Swab        | Positive                 | 9.84            | 9.12            | 10.21           | <b>9.72</b>    | <b>0.55</b> | Positive       |
| 29     | Swab        | Positive                 | 7.22            | 7.17            | 7.24            | <b>7.21</b>    | <b>0.04</b> | Positive       |
| 30     | Swab        | Positive                 | 6.22            | 6.36            | 6.10            | <b>6.23</b>    | <b>0.13</b> | Positive       |
| 31     | Swab        | Positive                 | 22.72           | 20.96           | 21.93           | <b>21.87</b>   | <b>0.89</b> | Positive       |
| 32     | Swab        | Positive                 | 9.57            | 8.36            | 9.09            | <b>9.01</b>    | <b>0.61</b> | Positive       |
| 33     | Swab        | Positive                 | 9.81            | 9.13            | 10.94           | <b>9.96</b>    | <b>0.91</b> | Positive       |
| 34     | Swab        | Positive                 | 7.28            | 6.83            | 6.35            | <b>6.82</b>    | <b>0.47</b> | Positive       |
| 35     | Swab        | Positive                 | 7.01            | 7.97            | 7.34            | <b>7.44</b>    | <b>0.49</b> | Positive       |
| 36     | Swab        | Positive                 | 4.61            | 4.15            | 4.75            | <b>4.50</b>    | <b>0.31</b> | Negative       |
| 37     | Swab        | Positive                 | 6.28            | 6.51            | 6.35            | <b>6.38</b>    | <b>0.12</b> | Positive       |

**Table S3.** Cost estimate for microwell plate immunoassay on polyester substrates

| Consumables                                 | Quantity                                       | Cost (US\$)                      | Manufactured plate quantity | Total cost/plate (US\$) |
|---------------------------------------------|------------------------------------------------|----------------------------------|-----------------------------|-------------------------|
| Thermal laminating Sheets (A4)              | 1 unit                                         | 0.53                             | 2.67                        | 0.20                    |
| <b>Plate total</b>                          |                                                |                                  |                             | <b>0.20</b>             |
| Reagents                                    | Concentration                                  | Vol./microwell ( $\mu\text{L}$ ) | Cost (US\$)/microwell       | Total cost (US\$)/plate |
| Blocking solution                           | 1% (v:v)                                       | 2                                | $1.41 \times 10^{-4}$       | 0.013                   |
| Biotinylated detection antibody             | 2.0 ( $\mu\text{g. mL}^{-1}$ )                 | 2                                | $1.39 \times 10^{-2}$       | 1.33                    |
| Streptavidin-HRP                            | 1:1000 (v:v)                                   | 2                                | $1.25 \times 10^{-3}$       | 0.12                    |
| TMB Liquid Substrate, for ELISA             | -                                              | 2                                | $2.16 \times 10^{-3}$       | 0.21                    |
| Step washing                                | 10 mmol.L <sup>-1</sup> PBS and 0.05% Tween 20 | Volume/step - 10 mL              | $2.67 \times 10^{-2}$       | 0.11                    |
| <b>Total reagents</b>                       |                                                |                                  |                             | <b>1.78</b>             |
| <b>Total cost (US\$)/ plate immunoassay</b> |                                                |                                  |                             | <b>1.98</b>             |
| <b>Total cost (US\$)/ microwell</b>         |                                                |                                  |                             | <b>0.021</b>            |
